# Supplementary material
Source: publisher site journal article supplement (https://www.spandidos-publications.com/3489/downloadSupplementary)

Figure S1. A total of  $4 \times 10^6$  SKOV3 cells were subcutaneously injected to the right armpit region of the mice and the body weight of the nude mice was observed from the day of inoculation. MB, microbubble; NC, negative control; SIRT3, Sirtuin 3.

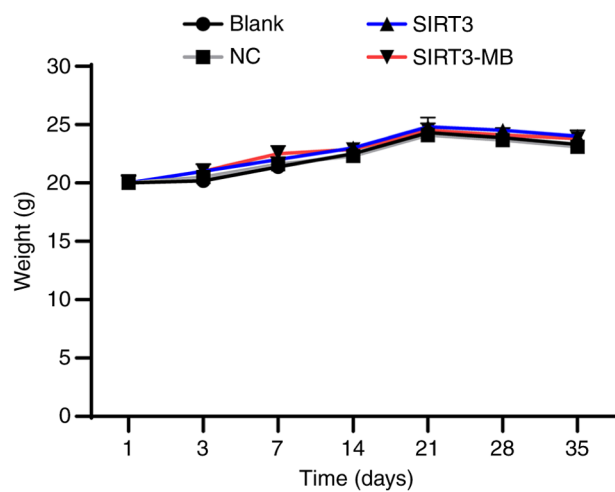

Supplement: Supplementary file 1 [file downloadSupplementary]
